# Supplementary material
Source: PubMed Central journal article supplement (PMC4965301)

## Supplemental Digital Appendix 1 Covariates Included in Probit Models

| <b>Variables</b>                                                                                                                               | <b>Model 1</b> | <b>Model 2</b> | <b>Model 3</b> | <b>Model 4</b> | <b>Model 5</b> |
|------------------------------------------------------------------------------------------------------------------------------------------------|----------------|----------------|----------------|----------------|----------------|
| <b>Demographics</b>                                                                                                                            |                |                |                |                |                |
| Race/Ethnicity                                                                                                                                 | X              | X              | X              | X              | X              |
| Gender                                                                                                                                         | X              | X              | X              | X              | X              |
| Age, Age-Squared <sup>a</sup>                                                                                                                  | X              | X              | X              | X              | X              |
| Naturalized Citizen                                                                                                                            | X              | X              | X              | X              | X              |
| Non-Citizen                                                                                                                                    | X              | X              | X              | X              | X              |
| Race Unknown                                                                                                                                   | X              | X              | X              | X              | X              |
| Foreign PhD                                                                                                                                    | X              | X              | X              | X              | X              |
| Nativity/Citizenship Missing                                                                                                                   | X              | X              | X              | X              | X              |
| <b>Education and Training</b>                                                                                                                  |                |                |                |                |                |
| Degree Type (PhD, MD/PhD)                                                                                                                      |                | X              | X              | X              | X              |
| NIH Training: (F, T, K)                                                                                                                        |                | X              | X              | X              | X              |
| PhD Major Field:<br>(Biomedicine, Chemistry, Physics,<br>Engineering, Psychology, Field Missing)                                               |                | X              | X              | X              | X              |
| NIH Funding Rank of PhD Institution:<br>(Top 30, 31-100, 100-200) <sup>b</sup>                                                                 |                | X              | X              | X              | X              |
| <b>Employer Characteristics</b>                                                                                                                |                |                |                |                |                |
| Employer NIH Funding Rank:<br>(Top 30, 31-100, 100-200, 200+,<br>unranked) <sup>b</sup>                                                        |                |                | X              | X              | X              |
| Employer Organization Type:<br>(Research Institute, Hospital,<br>Higher Education, Other)                                                      |                |                | X              | X              | X              |
| Higher Education Carnegie Class:<br>(Research Very High, Research High<br>Research, Medicine, BA or MA Inst.,<br>Other, Carnegie Rank missing) |                |                | X              | X              | X              |
| Region:<br>(Midwest, South, West)                                                                                                              |                |                | X              | X              | X              |
| <b>NIH Experience</b>                                                                                                                          |                |                |                |                |                |
| NIH Institute Code:<br>(21 Indicators for IC receiving proposal)                                                                               |                |                |                | X              | X              |
| Prior NIH Grant                                                                                                                                |                |                |                | X              | X              |
| NIH Review Committee Member                                                                                                                    |                |                |                | X              | X              |
| Grant uses Human Subjects                                                                                                                      |                |                |                | X              | X              |
| Human Subject Code Missing                                                                                                                     |                |                |                | X              | X              |
| Fiscal Year (2001 - 2006)                                                                                                                      |                |                |                | X              | X              |
| <b>Research Productivity</b>                                                                                                                   |                |                |                |                |                |

Supplemental digital content for Ginther DK, Kahn S, Schaffer WT. Gender, race/ethnicity, and National Institutes of Health R01 research awards: Is there evidence of a double bind for women of color? Acad Med. 2016.

|                                                         |  |  |  |  |          |
|---------------------------------------------------------|--|--|--|--|----------|
| Publication Quartiles (4-7, 8-18, >18) <sup>b</sup>     |  |  |  |  | <b>X</b> |
| Citation Quartiles (6-24, 25-84, >84) <sup>b</sup>      |  |  |  |  | <b>X</b> |
| Maximum Impact Factor of Publications <sup>a</sup>      |  |  |  |  | <b>X</b> |
| Median Impact Factor of Publications <sup>a</sup>       |  |  |  |  | <b>X</b> |
| Ratio of First author/ Total Publications <sup>a</sup>  |  |  |  |  | <b>X</b> |
| Ratio of Last author/ Total Publications <sup>a</sup>   |  |  |  |  | <b>X</b> |
| Ratio of Single author/ Total Publications <sup>a</sup> |  |  |  |  | <b>X</b> |
| Publication information missing                         |  |  |  |  | <b>X</b> |

Notes: Variables are indicator variables (0,1) unless otherwise indicated. <sup>a</sup>Continuous variables.

<sup>b</sup>Categorical variable

## Supplemental Digital Appendix 2

### Counts of 2000-2006 R01 Awards by Race/Ethnicity, Gender and Degree Status

|                   | PhD      |           | MD     |           | MD/PhD |           |
|-------------------|----------|-----------|--------|-----------|--------|-----------|
|                   | No Award | R01 Award | No R01 | R01 Award | No R01 | R01 Award |
| Asian Female      | 1,605    | 583       | 229    | 82        | 343    | 140       |
| Asian Male        | 6,191    | 1,969     | 678    | 250       | 1,912  | 738       |
| Black Female      | 291      | 58        | 81     | s         | s      | s         |
| Black Male        | 500      | 81        | 125    | s         | 131    | s         |
| Hispanic Female   | 483      | 164       | 114    | s         | 103    | s         |
| Hispanic Male     | 1,005    | 390       | 343    | 142       | 320    | 155       |
| White Female      | 10,541   | 4,250     | 1,298  | 556       | 1,169  | 545       |
| White Male        | 23,682   | 9,558     | 5,430  | 2,320     | 5,715  | 2,664     |
| Other Race Female | 1,061    | 385       | 470    | 172       | 316    | 87        |
| Other Race Male   | 3,229    | 1,090     | 1,708  | 604       | 1,168  | 441       |

Notes: s indicates suppressed because observations < 50. n/a indicates variable not applicable/available.

Source: NIH IMPAC II, NSF Survey of Doctorate Recipients, and AAMC Faculty Roster.

**Supplemental Digital Appendix 3**  
**Counts for Categorical Variables by Degree and R01 Award Status**

|                                            | PhD      | PhD       | MD       | MD        | MD/PhD   | MD/PhD    |
|--------------------------------------------|----------|-----------|----------|-----------|----------|-----------|
|                                            | No Award | R01 Award | No Award | R01 Award | No Award | R01 Award |
| <b>Demographics:</b>                       |          |           |          |           |          |           |
| Female                                     | 13,981   | 5,440     | 2,192    | 866       | 1,973    | 815       |
| Male                                       | 34,607   | 13,088    | 8,284    | 3,347     | 9,246    | 4,038     |
| Asian                                      | 7,796    | 2,552     | 907      | 332       | 2,255    | 878       |
| Black                                      | 791      | 139       | 206      | s         | 173      | s         |
| Hispanic                                   | 1,488    | 554       | 457      | 180       | 423      | 192       |
| White                                      | 34,223   | 13,808    | 6,728    | 2,876     | 6,884    | 3,209     |
| Other Race                                 | 86       | s         | s        | s         | s        | s         |
| Missing Race                               | 4,204    | 1,443     | 2,161    | 770       | 1,469    | 521       |
| New Investigator                           | 26,162   | 8,613     | 5,484    | 1,841     | 4,932    | 1,794     |
| Experienced Investigator                   | 22,426   | 9,915     | 4,992    | 2,372     | 6,287    | 3,059     |
| New Investigators Receiving Awards 2000-06 |          | 2,881     |          | 718       |          | 820       |
| US Native Born                             | 28,291   | 11,208    | n/a      | n/a       | 4,219    | 2,048     |
| US Naturalized                             | 1,271    | 419       | n/a      | n/a       | 313      | 121       |
| Non-Citizen                                | 12,530   | 5,309     | 728      | 383       | 3,483    | 1,530     |
| Citizenship Missing                        | 6,496    | 1,592     | 9,748    | 3,830     | 3,204    | 1,154     |
| <b>Education and Training:</b>             |          |           |          |           |          |           |
| PhD Biomedicine                            | 23,129   | 9,055     | n/a      | n/a       | 5,024    | 2,299     |
| PhD Chemistry                              | 2,876    | 1,023     | n/a      | n/a       | 146      | 69        |
| PhD Physics                                | 670      | 278       | n/a      | n/a       | 109      | s         |
| PhD Engineering                            | 2,553    | 882       | n/a      | n/a       | 303      | 115       |
| PhD Social & Behavioral                    | 6,293    | 2,716     | n/a      | n/a       | 372      | 197       |
| PhD Other Field                            | 1,732    | 443       | n/a      | n/a       | 175      | 74        |
| Missing PhD Field                          | 11,335   | 4,131     | n/a      | n/a       | 5,090    | 2,063     |
| PhD Institution NIH Funding Rank Top 30    | 11,621   | 5,079     | n/a      | n/a       | 2,577    | 1,267     |
| PhD Institution NIH Funding Rank 31-100    | 11,284   | 4,402     | n/a      | n/a       | 1,801    | 894       |
| PhD Institution NIH Funding Rank 101-200   | 6,141    | 2,102     | n/a      | n/a       | 559      | 207       |
| PhD Institution NIH Funding Rank 200+      | 3,543    | 1,137     | n/a      | n/a       | 458      | 145       |
| PhD Institution NIH Funding Unranked       | 15,999   | 5,808     | n/a      | n/a       | 5,824    | 2,340     |
| No NIH Training Funding                    | 27,926   | 9,693     | 5,055    | 1,744     | 5,545    | 2,068     |
| T Training                                 | 13,683   | 5,973     | 3,378    | 1,533     | 4,068    | 2,027     |
| F Training                                 | 9,031    | 3,967     | 988      | 465       | 1,465    | 694       |
| K Training                                 | 3,385    | 1,526     | 3,266    | 1,581     | 2,372    | 1,258     |
| <b>Employer Characteristics:</b>           |          |           |          |           |          |           |
| Employer NIH Funding Rank Top 30           | 13,621   | 6,775     | 4,658    | 2,153     | 4,585    | 2,345     |

Supplemental digital content for Ginther DK, Kahn S, Schaffer WT. Gender, race/ethnicity, and National Institutes of Health R01 research awards: Is there evidence of a double bind for women of color? Acad Med. 2016.

|                                   | <b>PhD</b>      | <b>PhD</b>       | <b>MD</b>       | <b>MD</b>        | <b>MD/PhD</b>   | <b>MD/PhD</b>    |
|-----------------------------------|-----------------|------------------|-----------------|------------------|-----------------|------------------|
|                                   | <b>No Award</b> | <b>R01 Award</b> | <b>No Award</b> | <b>R01 Award</b> | <b>No Award</b> | <b>R01 Award</b> |
| Employer NIH Funding Rank 31-100  | 17,481          | 6,614            | 3,590           | 1,368            | 4,015           | 1,690            |
| Employer NIH Funding Rank 101-200 | 8,526           | 3,022            | 1,192           | 455              | 1,384           | 527              |
| Employer NIH Funding Rank 200+    | 8,960           | 2,117            | 1,036           | 237              | 1,235           | 291              |
| Carnegie Research Very High       | 23,316          | 10,078           | 4,996           | 2,200            | 5,349           | 2,547            |
| Carnegie Research High            | 4,506           | 1,146            | 398             | 124              | 536             | 142              |
| Carnegie Research                 | 589             | 88               | s               | s                | s               | s                |
| Carnegie Medical School           | 4,686           | 1,791            | 1,290           | 481              | 1,252           | 523              |
| Carnegie Masters/Bachelors        | 770             | 138              | s               | s                | s               | s                |
| Carnegie Other Institution        | 89              | s                | s               | s                | 3               |                  |
| Carnegie Unranked Higher Ed       | 6,674           | 2,386            | 1,115           | 360              | 1,366           | 499              |
| Research Organization             | 4,028           | 1,613            | 781             | 272              | 1,019           | 407              |
| Hospital                          | 2,413           | 932              | 1,448           | 644              | 1,213           | 604              |
| Other Organization                | 1,517           | 338              | 402             | 123              | 409             | 111              |
| <b>NIH Experience:</b>            |                 |                  |                 |                  |                 |                  |
| Prior NIH Funding                 | 34,048          | 14,817           | 8,165           | 3,768            | 8,981           | 4,347            |
| NIH Review Committee Experience   | 21,613          | 9,991            | 5,170           | 2,482            | 5,999           | 2,963            |
| NIAAA                             | 723             | 378              | 137             | 72               | 132             | 71               |
| NIA                               | 2,427           | 789              | 408             | 181              | 551             | 192              |
| NIAID                             | 4,388           | 1,785            | 899             | 430              | 1,007           | 558              |
| NIAMS                             | 1,546           | 437              | 425             | 148              | 382             | 164              |
| NCCAM                             | 293             | 58               | 116             | s                | 97              | s                |
| NCI                               | 7,380           | 2,440            | 1,590           | 598              | 2,328           | 892              |
| NIDA                              | 2,223           | 959              | 297             | 139              | 366             | 179              |
| NIDCD                             | 711             | 465              | 82              | s                | 79              | 56               |
| NIDCR                             | 991             | 386              | 70              | s                | 123             | 54               |
| NIDDK                             | 3,304           | 1,123            | 1,408           | 558              | 1,136           | 434              |
| NIBIB                             | 1,008           | 317              | 90              | s                | 144             | s                |
| NIEHS                             | 1,027           | 323              | 106             | s                | 175             | 78               |
| NEI                               | 1,070           | 564              | 141             | 57               | 206             | 98               |
| NIGMS                             | 5,802           | 2,434            | 192             | 79               | 469             | 224              |
| NICHD                             | 3,434           | 968              | 647             | 189              | 560             | 155              |
| NHGRI                             | 346             | 166              | s               | s                | s               | s                |
| NHLBI                             | 4,450           | 1,768            | 2,241           | 979              | 1,632           | 790              |
| NLM                               | 163             | s                | s               | s                | s               | s                |
| NIMH                              | 2,903           | 1,296            | 756             | 313              | 609             | 261              |
| NINR                              | 553             | 288              | s               | s                | s               | s                |
| NINDS                             | 3,424           | 1,451            | 741             | 283              | 1,056           | 532              |
| NCRR                              | 257             | 56               | s               | s                | s               | s                |
| FIC                               | 165             | s                | s               | s                | s               | s                |

Supplemental digital content for Ginther DK, Kahn S, Schaffer WT. Gender, race/ethnicity, and National Institutes of Health R01 research awards: Is there evidence of a double bind for women of color? Acad Med. 2016.

|                                            | PhD      | PhD       | MD       | MD        | MD/PhD   | MD/PhD    |
|--------------------------------------------|----------|-----------|----------|-----------|----------|-----------|
|                                            | No Award | R01 Award | No Award | R01 Award | No Award | R01 Award |
| <b>Fiscal Year and Region:</b>             |          |           |          |           |          |           |
| Fiscal Year 2000                           | 5,462    | 2,720     | 1,206    | 654       | 1,193    | 698       |
| Fiscal Year 2001                           | 5,354    | 2,763     | 1,227    | 652       | 1,170    | 701       |
| Fiscal Year 2002                           | 5,178    | 2,613     | 1,198    | 620       | 1,195    | 688       |
| Fiscal Year 2003                           | 6,077    | 2,842     | 1,284    | 613       | 1,385    | 735       |
| Fiscal Year 2004                           | 6,876    | 2,712     | 1,554    | 602       | 1,622    | 798       |
| Fiscal Year 2005                           | 7,585    | 2,430     | 1,608    | 577       | 1,746    | 658       |
| Fiscal Year 2006                           | 12,056   | 2,448     | 2,399    | 495       | 2,908    | 575       |
| North Region                               | 13,093   | 5,380     | 3,351    | 1,485     | 3,566    | 1,701     |
| Midwest Region                             | 10,355   | 3,979     | 2,148    | 820       | 2,067    | 910       |
| South Region                               | 15,189   | 5,171     | 2,781    | 1,049     | 3,322    | 1,172     |
| West Region                                | 9,951    | 3,998     | 2,196    | 859       | 2,264    | 1,070     |
| <b>Productivity:</b>                       |          |           |          |           |          |           |
| <=3 Publications                           | 12,763   | 5,251     | 2,498    | 1,045     | 2,499    | 1,248     |
| 4-7 Publications                           | 8,961    | 3,572     | 1,955    | 803       | 1,927    | 834       |
| 8-18 Publications                          | 9,368    | 3,545     | 2,232    | 930       | 2,445    | 1,034     |
| 18+ Publications                           | 9,227    | 3,429     | 2,336    | 963       | 2,943    | 1,233     |
| Publications Not Matched                   | 8,269    | 2,731     | 1,455    | 472       | 1,405    | 504       |
| <=5 Citations                              | 11,590   | 4,457     | 1,944    | 817       | 1,926    | 884       |
| 6-24 Citations                             | 10,064   | 3,542     | 2,188    | 790       | 1,984    | 830       |
| 25-84 Citations                            | 10,102   | 3,834     | 2,465    | 998       | 2,576    | 1,074     |
| >84 Citations                              | 8,563    | 3,964     | 2,424    | 1,136     | 3,328    | 1,561     |
| Citations Not Matched                      | 8,269    | 2,731     | 1,455    | 472       | 1,405    | 504       |
| Submitted Once                             | 33,426   | 8,513     | 7,560    | 1,952     | 7,931    | 2,338     |
| Submitted Twice                            | 11,143   | 6,641     | 2,198    | 1,539     | 2,470    | 1,700     |
| Submitted Three Times                      | 3,914    | 3,289     | 695      | 711       | 794      | 800       |
| Submitted Four + Times                     | 105      | 85        | s        | s         | s        | s         |
| Scored Grants                              | 20,057   | 18,528    | 4,721    | 4,213     | 5,002    | 4,853     |
| Age                                        | 48.20    | 46.58     | 49.70    | 48.48     | 48.92    | 47.45     |
|                                            | [8.98]   | [8.55]    | [8.77]   | [8.16]    | [8.41]   | [7.75]    |
| Maximum Impact Factor                      | 8.15     | 9.55      | 9.89     | 11.47     | 11.06    | 12.46     |
|                                            | [9.73]   | [10.58]   | [11.86]  | [12.66]   | [11.74]  | [12.28]   |
| Median Impact Factor                       | 3.27     | 3.99      | 3.47     | 4.03      | 3.95     | 4.69      |
|                                            | [3.38]   | [4.10]    | [3.07]   | [3.53]    | [3.46]   | [4.34]    |
| Ratio of First Authored/Total Publications | 0.32     | 0.32      | 0.34     | 0.33      | 0.30     | 0.30      |
|                                            | [0.34]   | [0.34]    | [0.33]   | [0.33]    | [0.31]   | [0.31]    |
| Ratio of Last Authored/Total Publications  | 0.25     | 0.27      | 0.22     | 0.26      | 0.27     | 0.29      |
|                                            | [0.30]   | [0.31]    | [0.26]   | [0.28]    | [0.29]   | [0.29]    |

Supplemental digital content for Ginther DK, Kahn S, Schaffer WT. Gender, race/ethnicity, and National Institutes of Health R01 research awards: Is there evidence of a double bind for women of color? Acad Med. 2016.

|                                             | <b>PhD</b>      | <b>PhD</b>       | <b>MD</b>       | <b>MD</b>        | <b>MD/PhD</b>   | <b>MD/PhD</b>    |
|---------------------------------------------|-----------------|------------------|-----------------|------------------|-----------------|------------------|
|                                             | <b>No Award</b> | <b>R01 Award</b> | <b>No Award</b> | <b>R01 Award</b> | <b>No Award</b> | <b>R01 Award</b> |
| Ratio of Single Authored/Total Publications | 0.72            | 0.09             | 0.09            | 0.10             | 0.08            | 0.09             |
|                                             | [0.18]          | [0.20]           | [0.19]          | [0.20]           | [0.18]          | [0.19]           |
| Priority Score                              | 241.03          | 164.12           | 244.7           | 166.94           | 240.54          | 166.7            |
|                                             | [48.56]         | [24.94]          | [51.15]         | [25.75]          | [49.25]         | [25.69]          |

Notes: s indicates suppressed because observations < 50. n/a indicates variable not applicable/available. Source: NIH IMPAC II, NSF Survey of Doctorate Recipients, and AAMC Faculty Roster.

Supplemental Digital Appendix 4

**Probit Models of Effect of Male Race/Ethnicity on National Institutes of Health R01 Type 1 Award Probability, Fiscal Years 2000-2006.**

| <b>PhD Sample</b> | <b>Model 1</b> | <b>Model 2</b> | <b>Model 3</b> | <b>Model 4</b> | <b>Model 5</b> |
|-------------------|----------------|----------------|----------------|----------------|----------------|
| Asian             | -0.059***      | -0.059***      | -0.057***      | -0.048***      | -0.049***      |
|                   | [0.007]        | [0.007]        | [0.007]        | [0.007]        | [0.007]        |
| Black             | -0.145***      | -0.146***      | -0.138***      | -0.125***      | -0.120***      |
|                   | [0.014]        | [0.014]        | [0.014]        | [0.015]        | [0.015]        |
| Hispanic          | -0.023         | -0.025         | -0.025         | -0.017         | -0.016         |
|                   | [0.014]        | [0.014]        | [0.014]        | [0.013]        | [0.013]        |
| Observations      | 47,695         | 47,695         | 47,695         | 47,695         | 47,695         |
| <b>MD Sample</b>  |                |                |                |                |                |
| Asian             | -0.062***      | -0.048***      | -0.042***      | -0.019         | -0.021*        |
|                   | [0.010]        | [0.011]        | [0.011]        | [0.011]        | [0.011]        |
| Black             | -0.104***      | -0.105***      | -0.086**       | -0.085**       | -0.074**       |
|                   | [0.025]        | [0.025]        | [0.027]        | [0.026]        | [0.027]        |
| Hispanic          | -0.015         | -0.015         | -0.007         | 0.008          | 0.010          |
|                   | [0.017]        | [0.017]        | [0.017]        | [0.018]        | [0.018]        |
| Observations      | 24,915         | 24,915         | 24,915         | 24,913         | 24,913         |

Models include controls for demographic characteristics, education and training, employer characteristics, NIH experience, and researcher productivity. Estimates are marginal effects that report the change in probability of receiving an R01 award given an infinitesimal change in continuous independent variables. Marginal effects on dummy variables report change in probability of receiving an R01 award given a change in the dummy from 0 to 1. Multiply marginal effects by 100 to obtain percentage points. Robust standard errors clustered on individual applicant are given in brackets. Sample sizes decrease when observations were dropped because they predict outcomes perfectly. Source: NIH IMPAC II, NSF Survey of Doctorate Recipients, and AAMC Faculty Roster. \* P < .05. \*\* P < .01. P < .001.



### Supplemental Digital Appendix 5

#### The Probability by Gender, Race/Ethnicity, and Degree of an Investigator Under the Age of 50 Submitting Only One, Unfunded Proposal for an R01 Grant from the National Institutes of Health

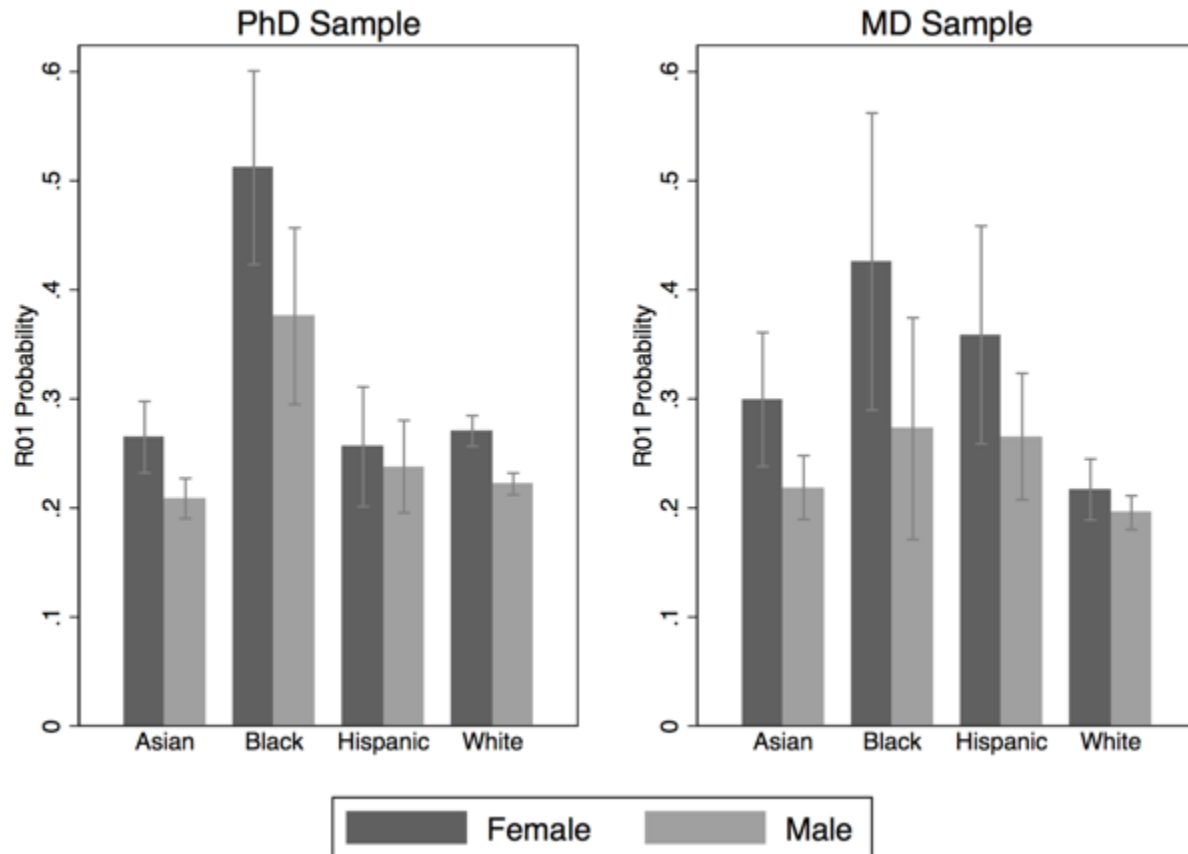

Supplement: NIHMS785777-supplement-Supplemental_Digital_Content.pdf [file NIHMS785777-supplement-Supplemental_Digital_Content.pdf]
